## CORRIGENDUM

# The Newfoundland population: a unique resource for genetic investigation of complex diseases

Proton Rahman, Albert Jones, Joseph Curtis, Sylvia Bartlett, Lynette Peddle, Bridget A. Fernandez and Nelson B. Freimer

*Human Molecular Genetics* 12, R167–R172 (2003)

In the section regarding Genetic Drift, some inaccuracies occurred in the paragraph which discussed the incidence of childhood diabetes in Newfoundland and Labrador. We suggest these would be best clarified by substituting the following:

Curtis and Hagerty determined the annual incidence of juvenile type 1 diabetes mellitus (IDDM), by systematically recording all incident cases of type 1 juvenile diabetes in children less than 15 years of age, over a 10 year period (1). The average annual incidence rate of juvenile type 1 diabetes in Newfoundland is 36 per 100 000 per year which is similar to that of Sardinia (36.8/100 000) and Finland (36.5/100 000) and far

greater than the incidence reported for admixed populations in the US (7–15/100 000).

This correctly references the authorship for this study. It also corrects a typographical error that occurred as children less than 15 years of age were studied and not 1 year of age as appears in the published text.

### REFERENCE

1. Curtis, J.A. and Hagerty, D. (2001) Unusually high incidence of type 1 diabetes mellitus in children under 15 years in Newfoundland and Labrador. *Pediatric Res.*, **49**, 93A [abstract].
